# Supplementary material
Source: PubMed Central journal article supplement (PMC2702264)

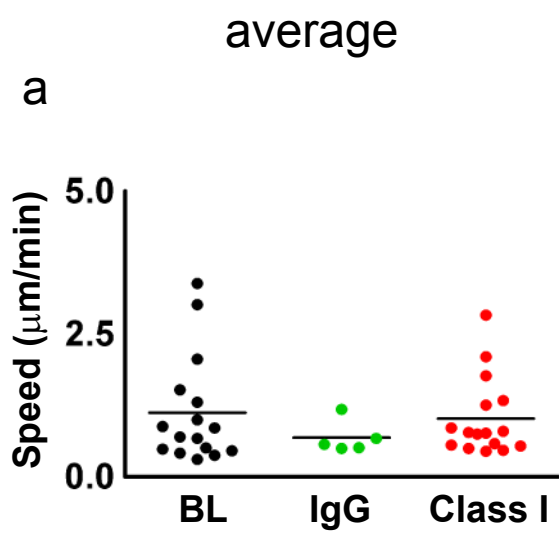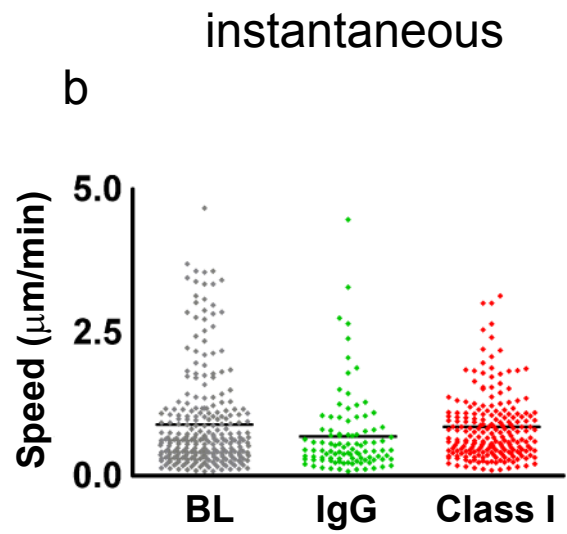

Supplement: NIHMS76743-supplement-1.pdf [file NIHMS76743-supplement-1.pdf]

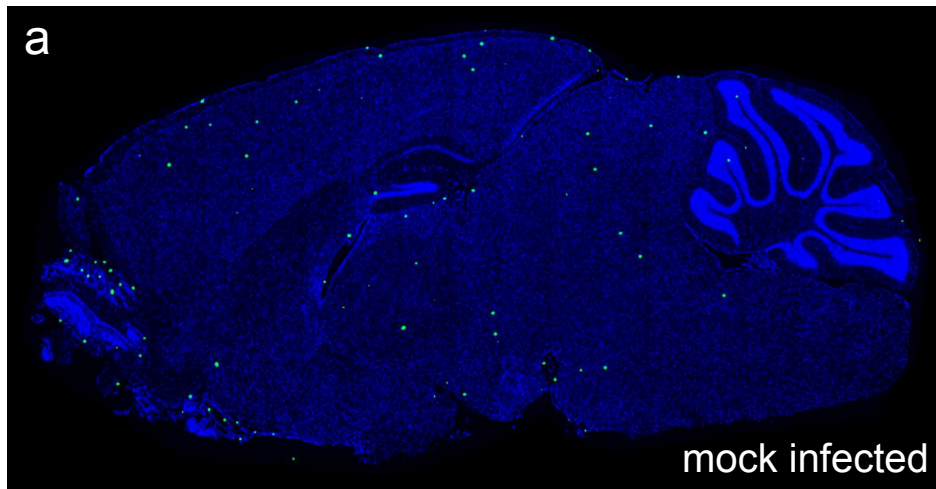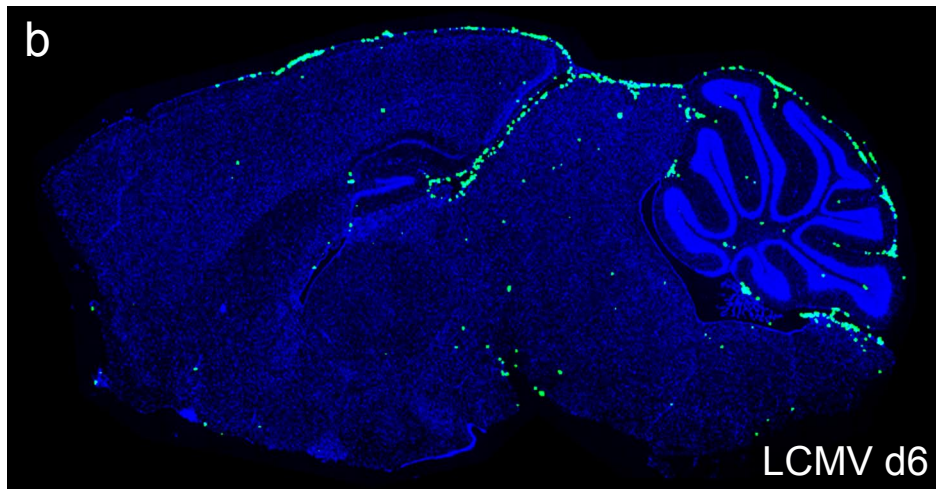

Green = LysM-GFP    Nuclei = Blue

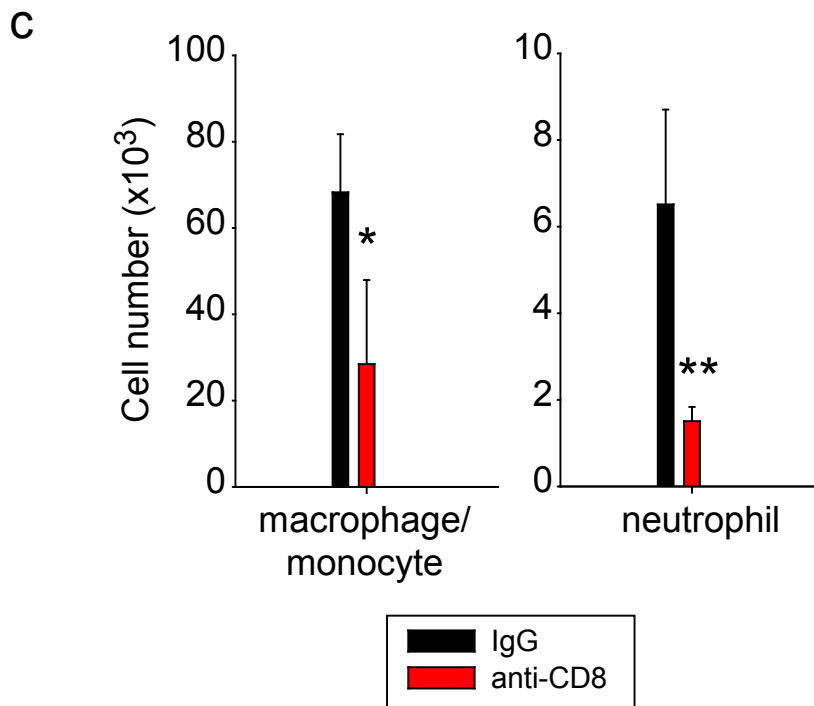

Supplement: NIHMS76743-supplement-10.pdf [file NIHMS76743-supplement-10.pdf]

low

medium

high

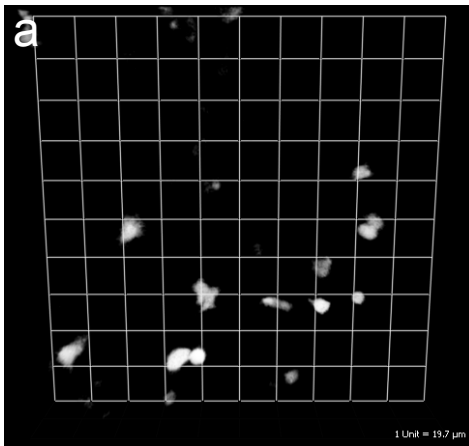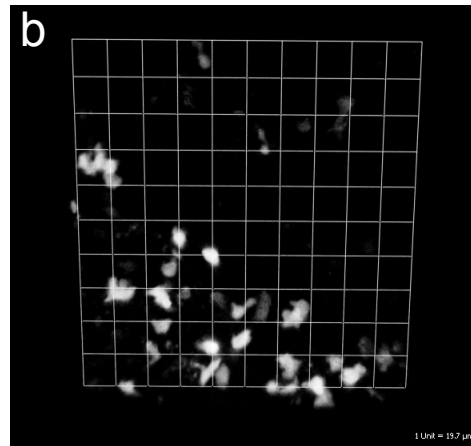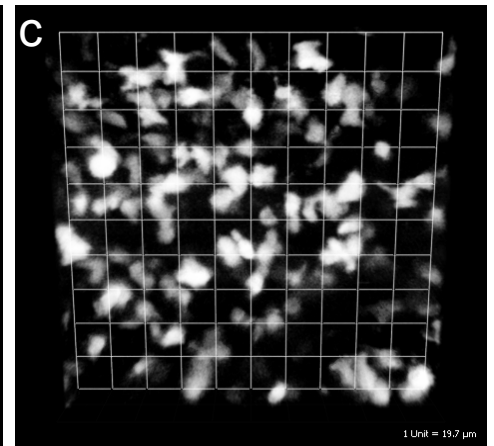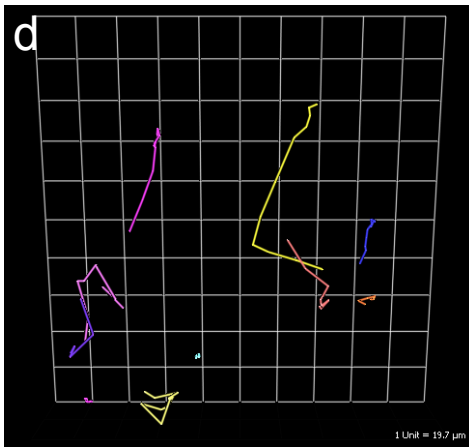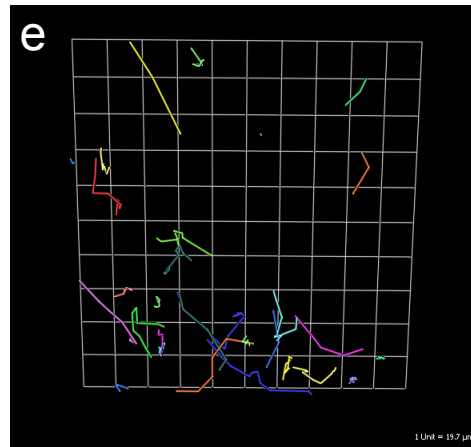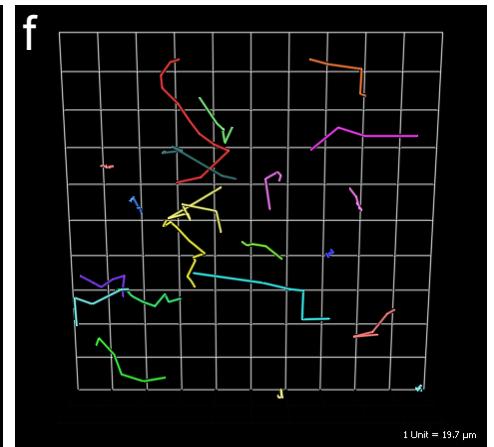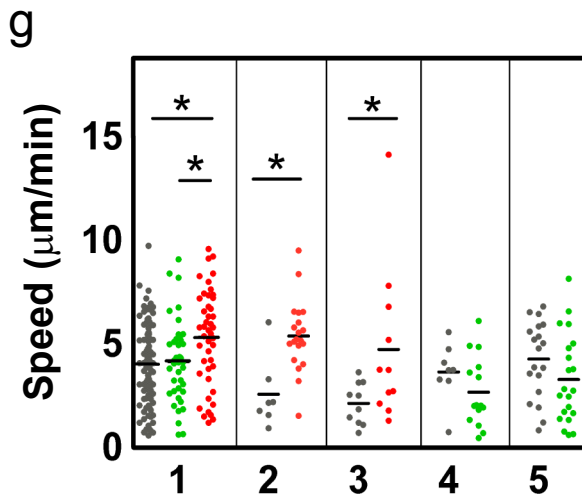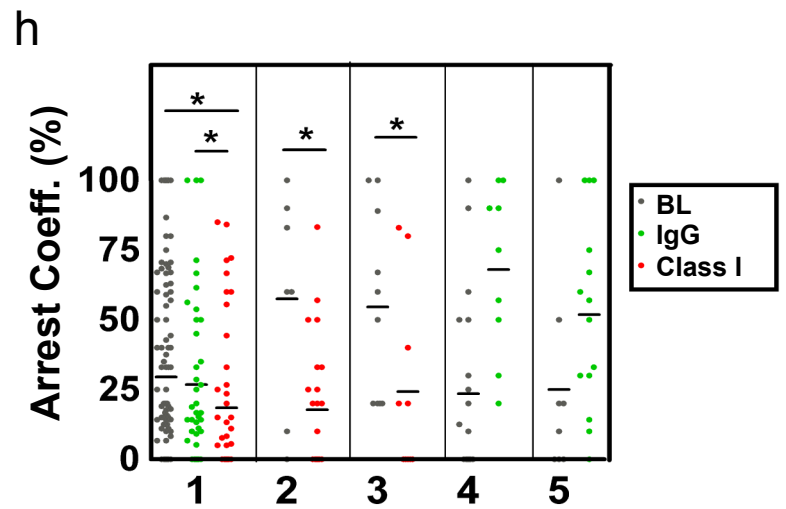

Supplementary Figure 2

Supplement: NIHMS76743-supplement-2.pdf [file NIHMS76743-supplement-2.pdf]

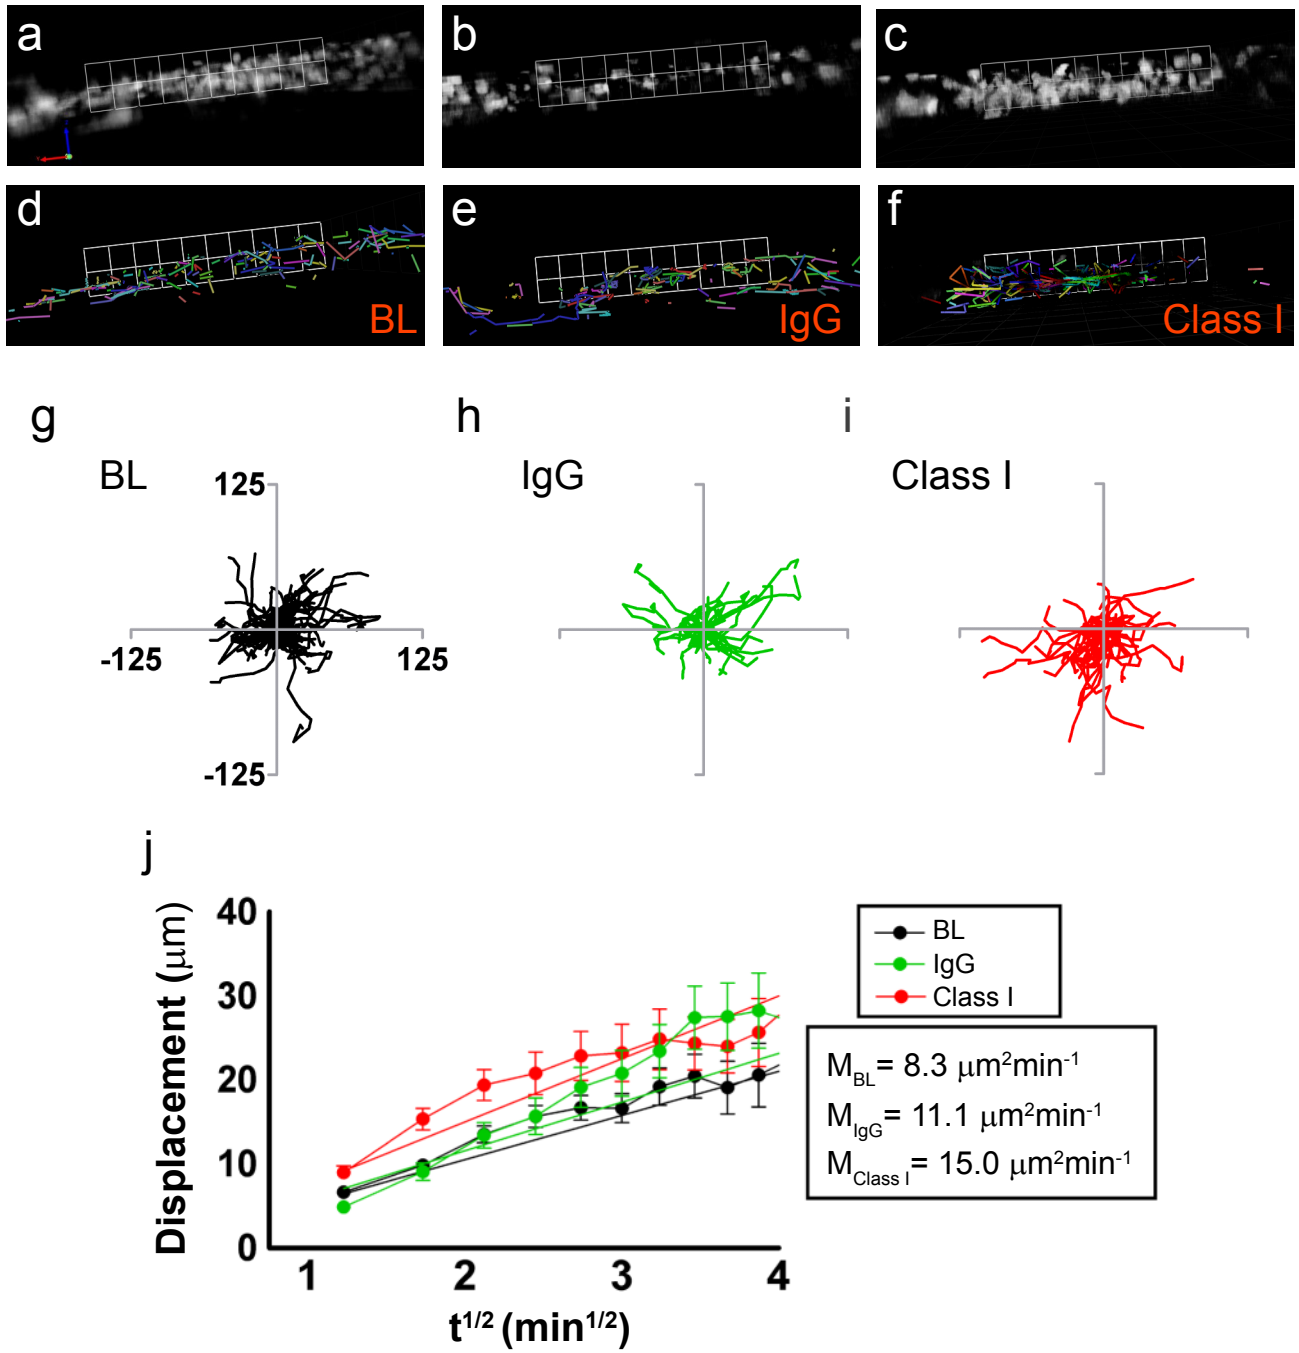

Supplementary Figure 3

Supplement: NIHMS76743-supplement-3.pdf [file NIHMS76743-supplement-3.pdf]

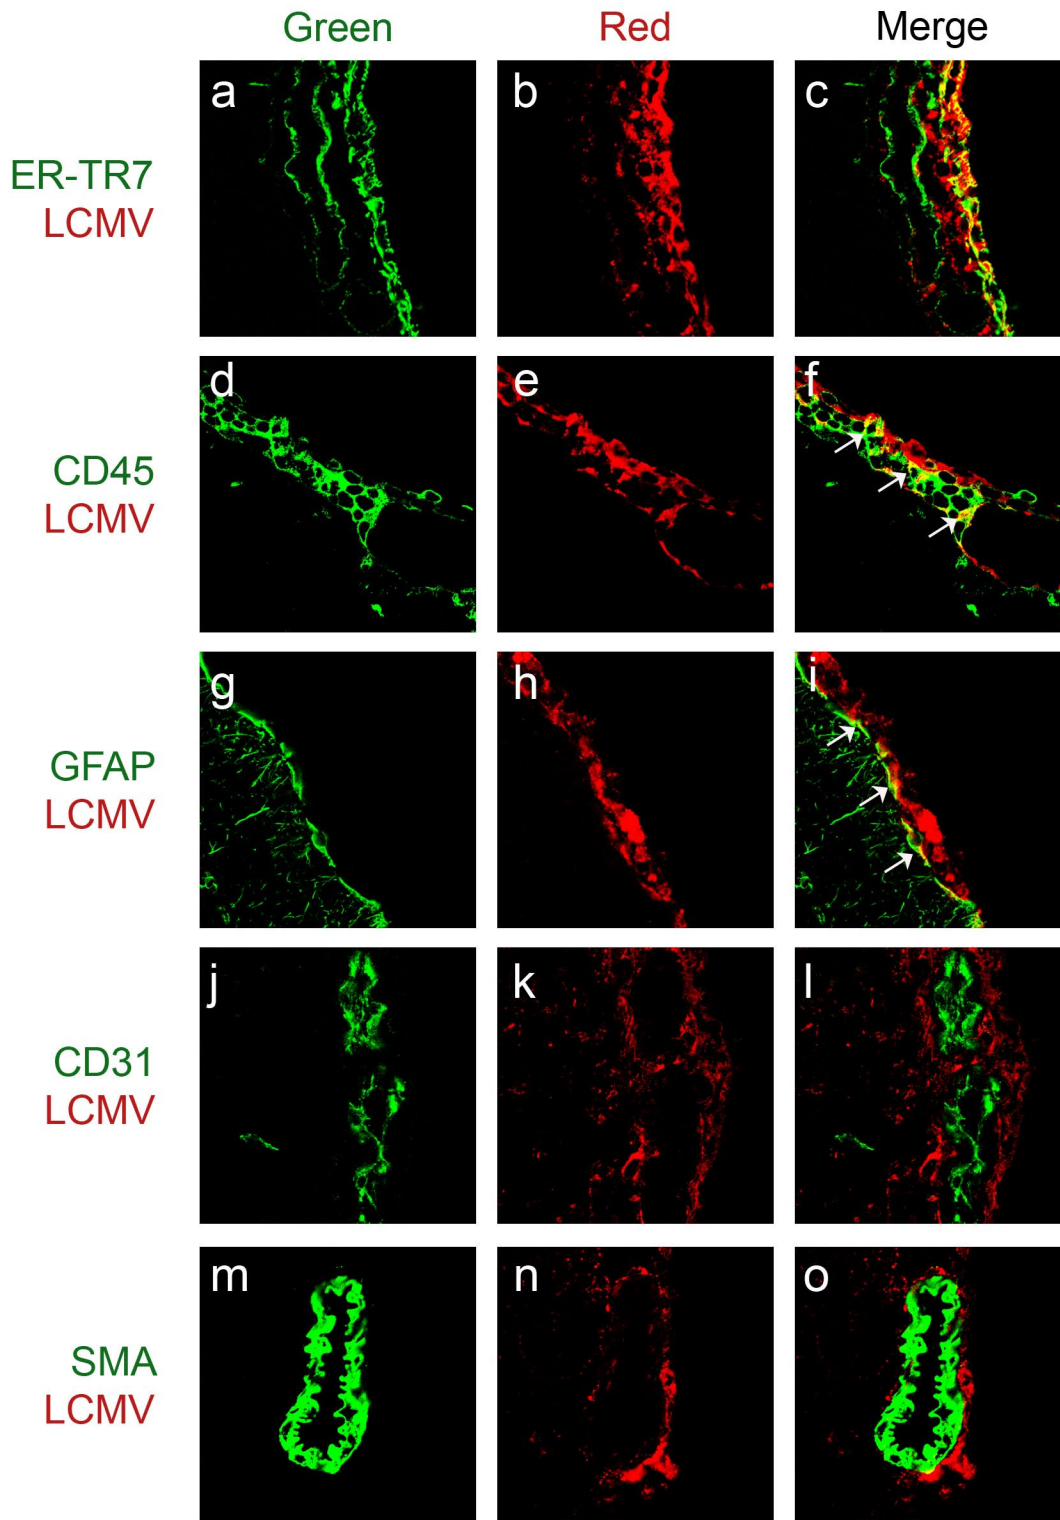

Supplementary Figure 4

Supplement: NIHMS76743-supplement-4.pdf [file NIHMS76743-supplement-4.pdf]

**a**

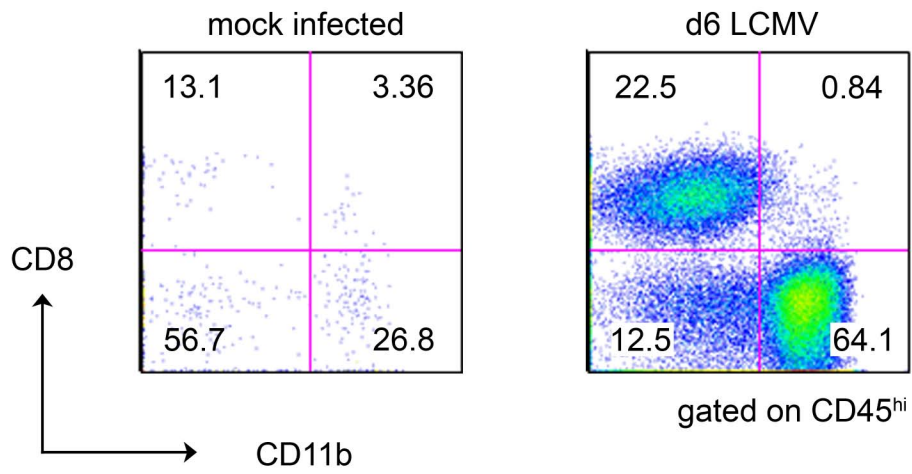

**b**

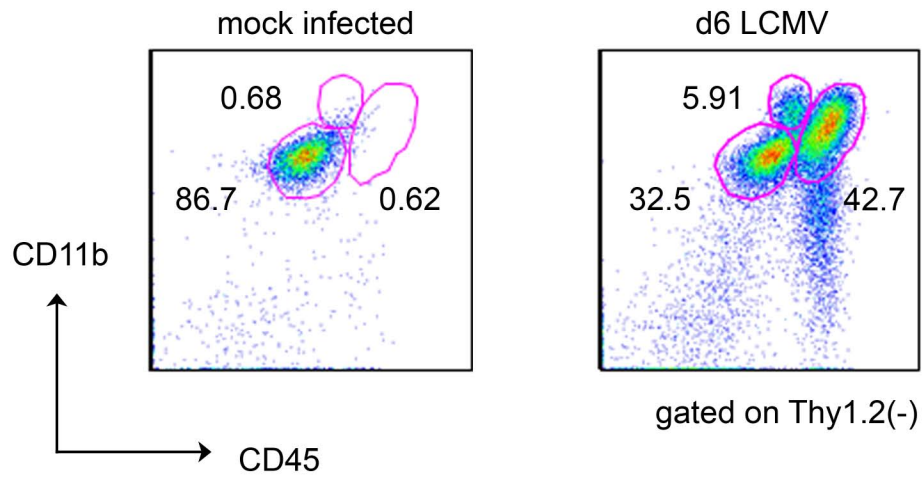

**c**

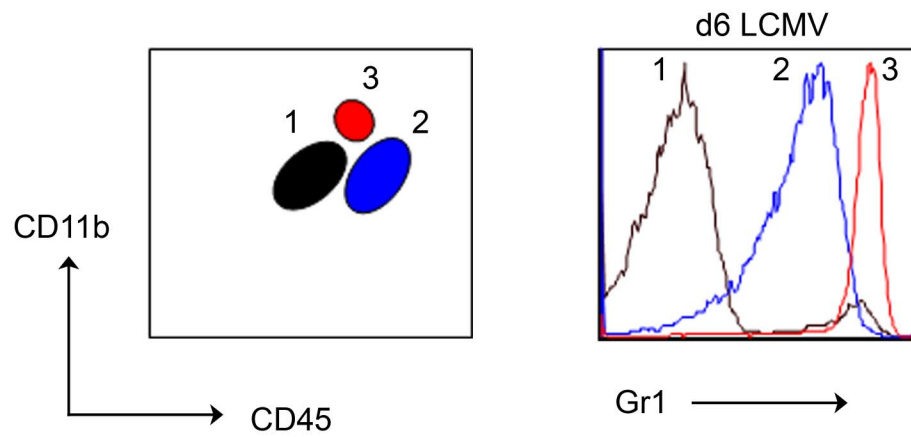

Supplementary Figure 5

Supplement: NIHMS76743-supplement-5.pdf [file NIHMS76743-supplement-5.pdf]

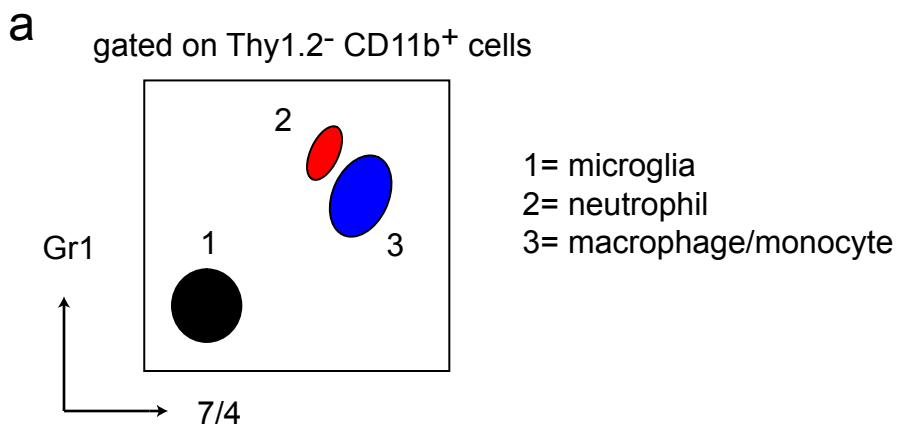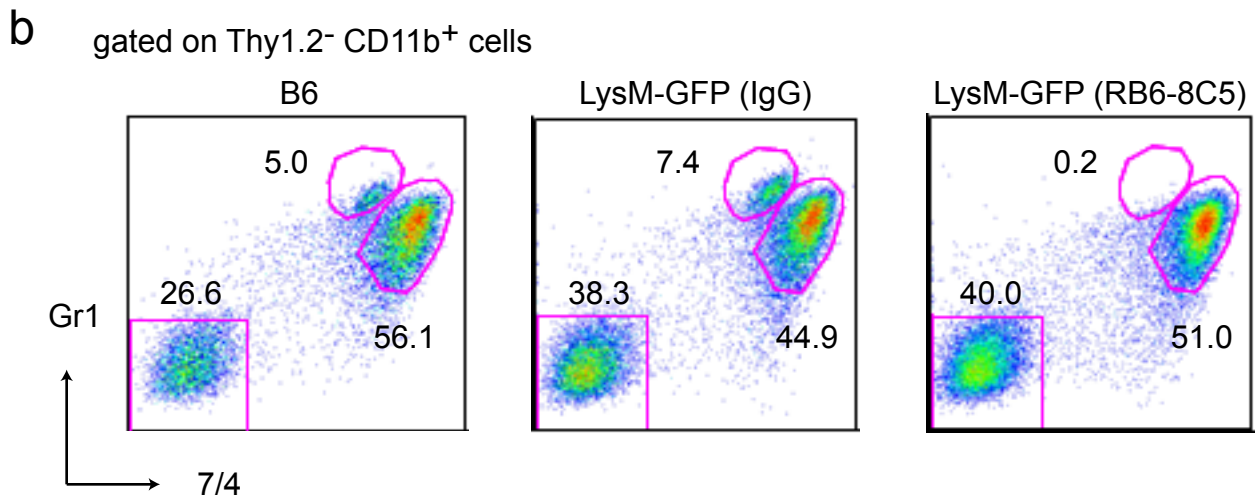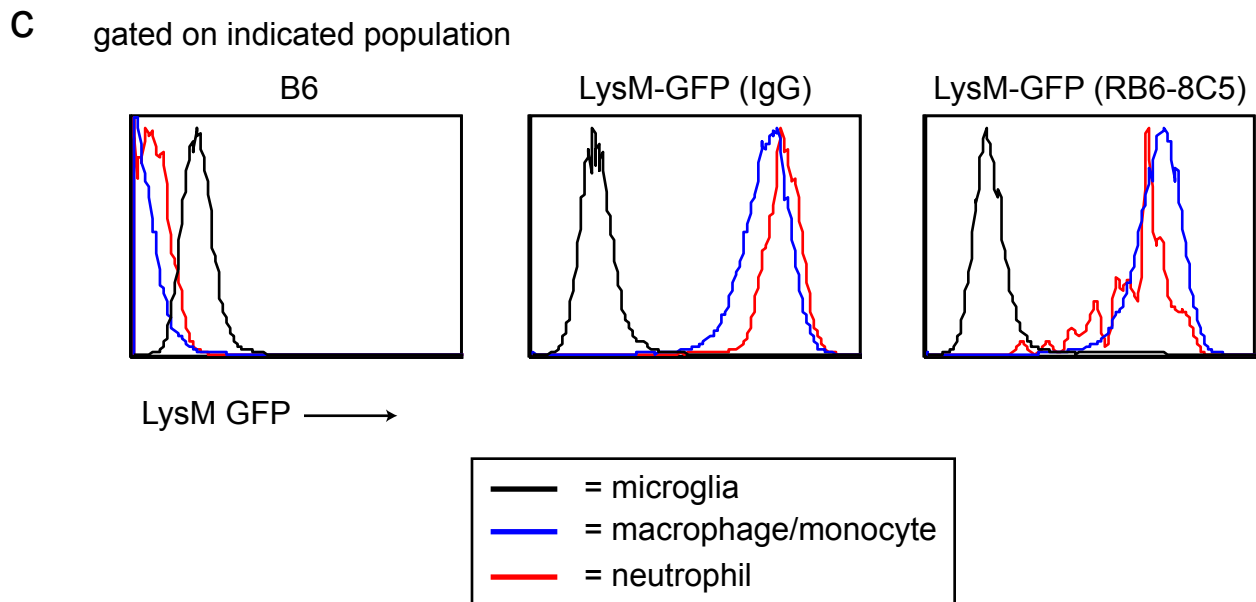

Supplement: NIHMS76743-supplement-6.pdf [file NIHMS76743-supplement-6.pdf]

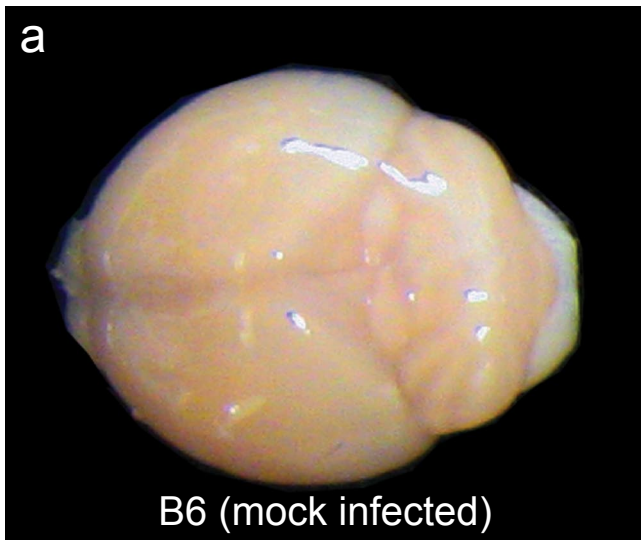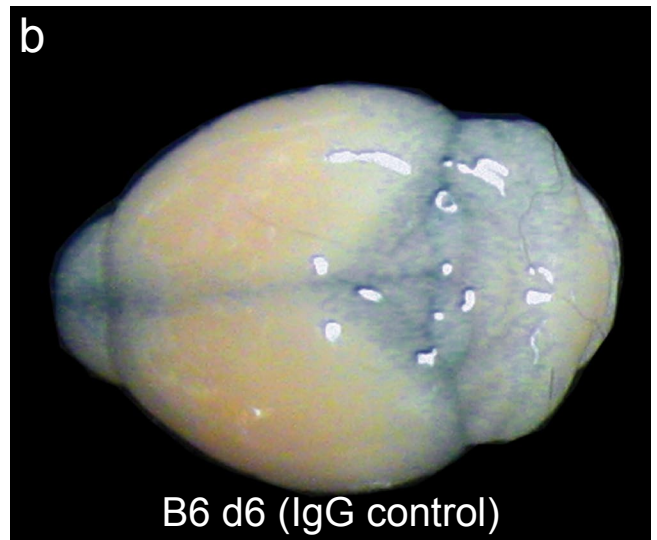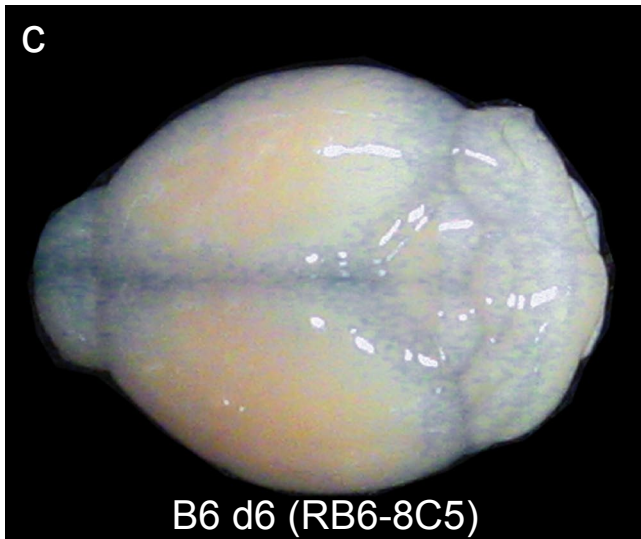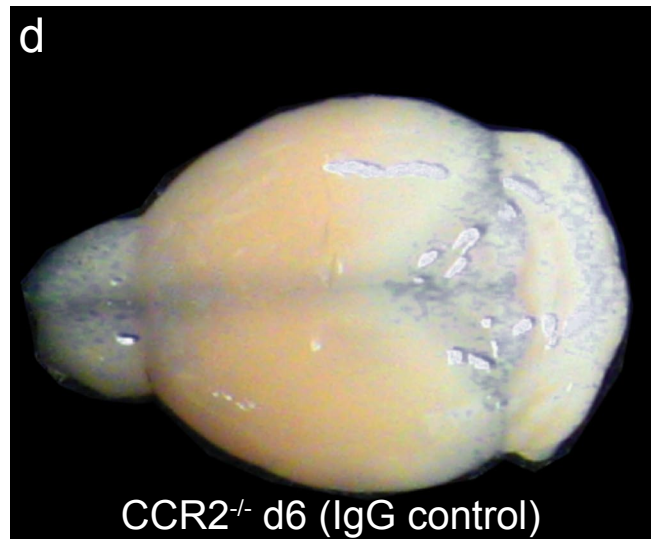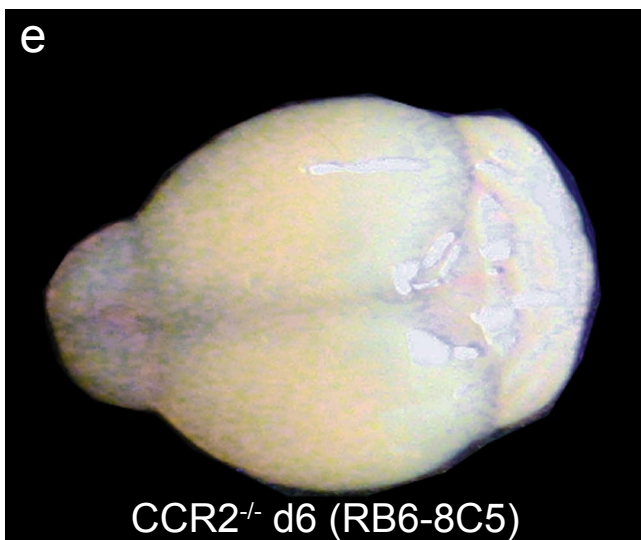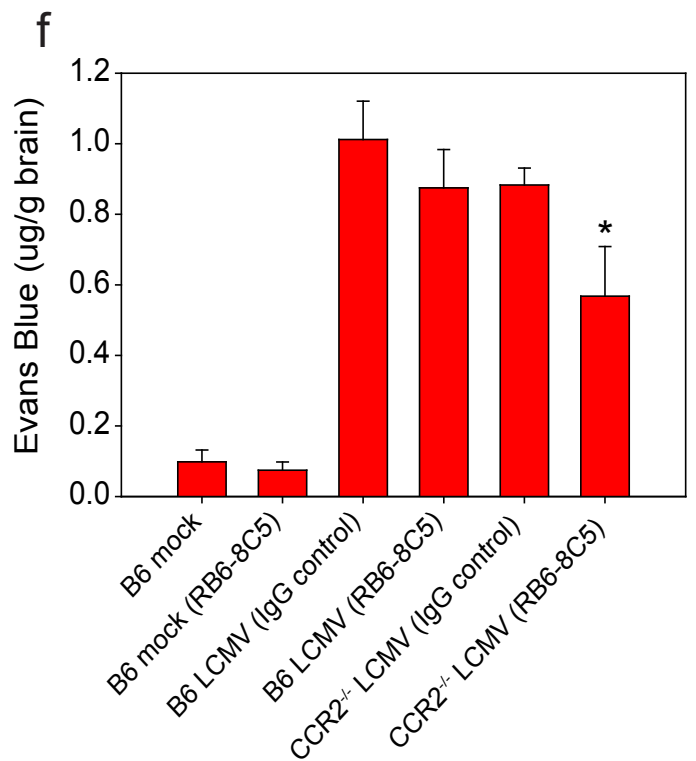

Supplementary Figure 7

Supplement: NIHMS76743-supplement-7.pdf [file NIHMS76743-supplement-7.pdf]

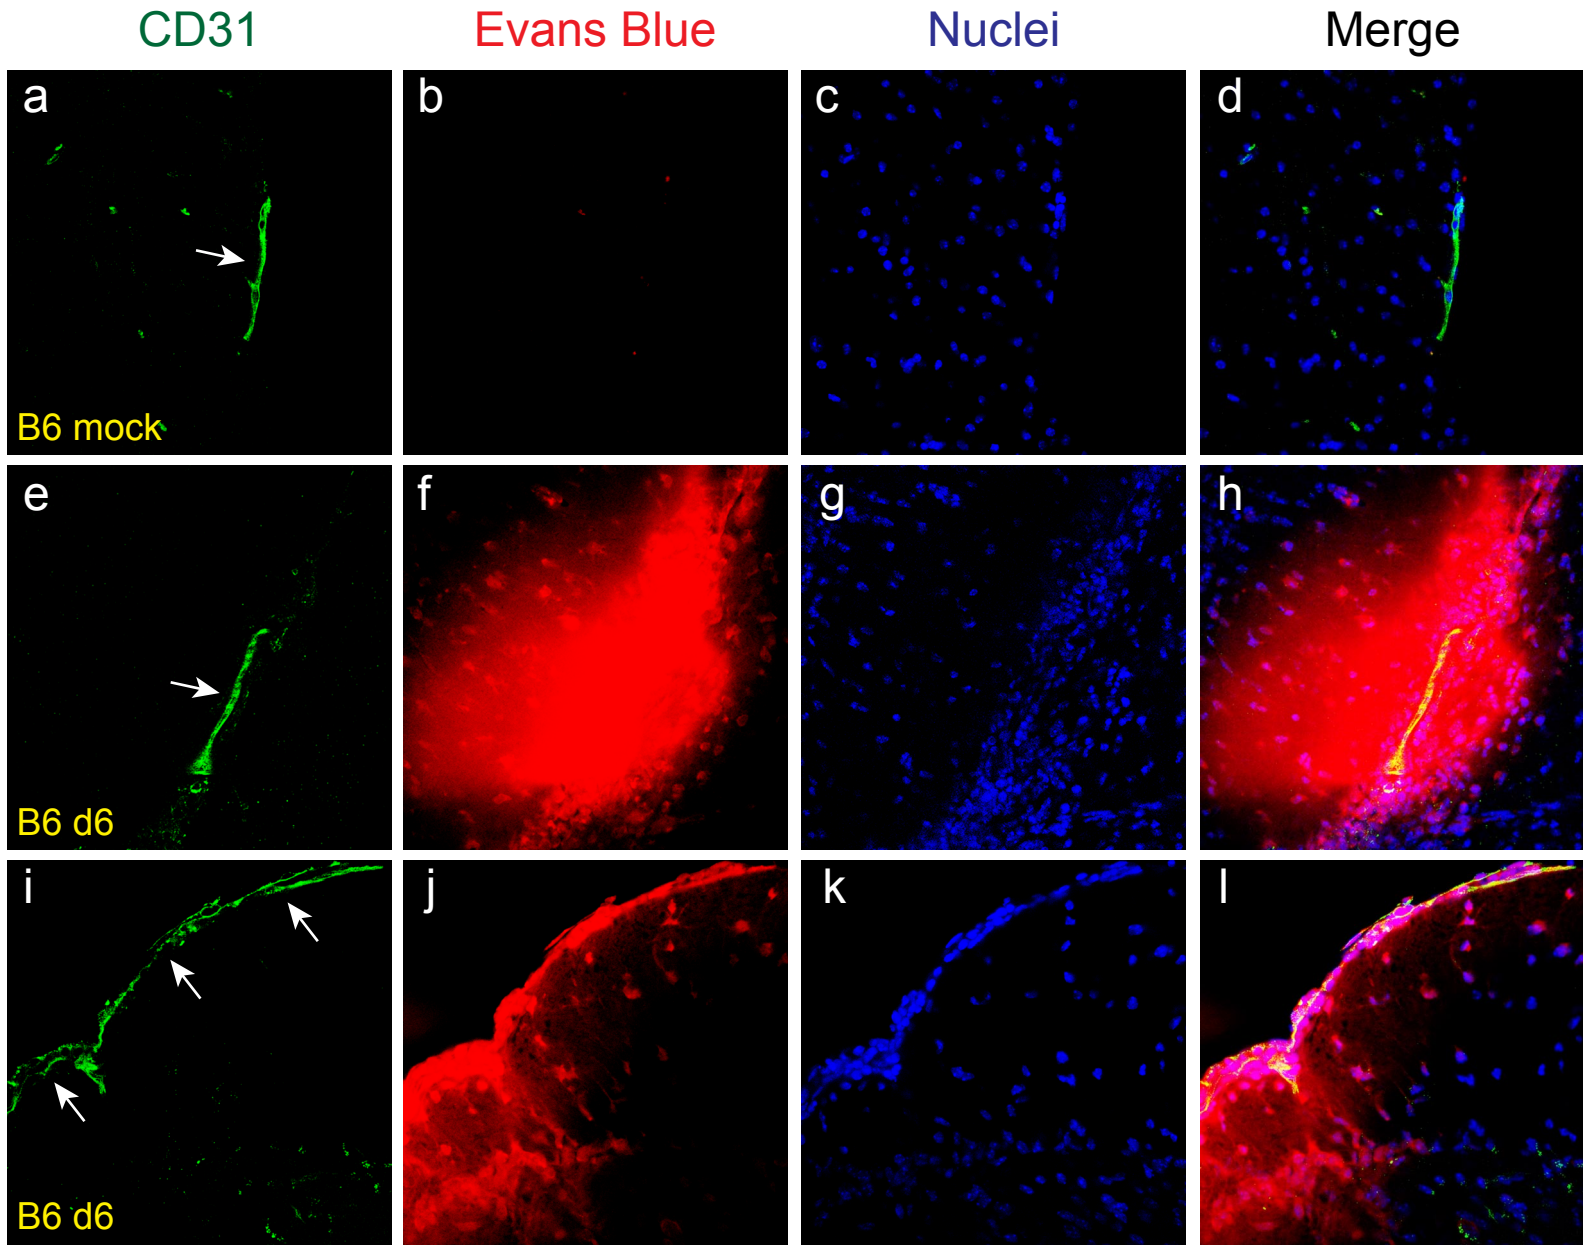

Supplementary Figure 8

Supplement: NIHMS76743-supplement-8.pdf [file NIHMS76743-supplement-8.pdf]

a

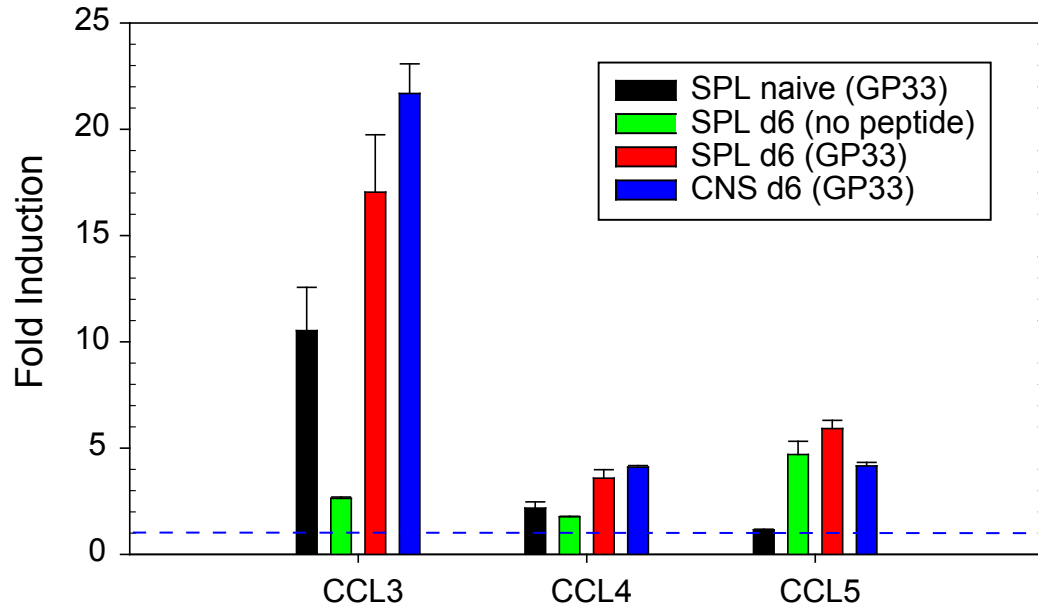

b

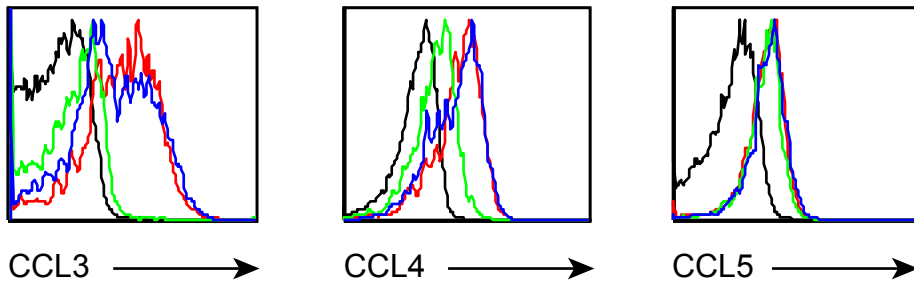

Supplement: NIHMS76743-supplement-9.pdf [file NIHMS76743-supplement-9.pdf]
